## Independent and joint effects of tea and milk consumption on oral cancer among non-smokers and non-drinkers: a case-control study in China

Fa Chen<sup>1,2,\*</sup>, Lingjun Yan<sup>1,2,\*</sup>, Lisong Lin<sup>3,\*</sup>, Fengqiong Liu<sup>1,2</sup>, Yu Qiu<sup>3</sup>, Fangping Liu<sup>1,2</sup>, Jiangfeng Huang<sup>1,2</sup>, Junfeng Wu<sup>1,2</sup>, Lin Cai<sup>1</sup>, Guoxi Cai<sup>4</sup>, Kiyoshi Aoyagi<sup>5</sup> and Baochang He<sup>1,2</sup>

<sup>1</sup> Department of Epidemiology and Health Statistics, School of Public Health, Fujian Medical University, Fujian, China

<sup>2</sup> Key Laboratory of Ministry of Education for Gastrointestinal Cancer, Fujian Medical University, Fujian, China

<sup>3</sup> Department of Oral and Maxillofacial Surgery, the First Affiliated Hospital of Fujian Medical University, Fujian, China

<sup>4</sup> Nagasaki Prefectural Institute of Environmental Research and Public Health, Institute of Tropical Medicine, Nagasaki University, Nagasaki, Japan

<sup>5</sup> Department of Public Health, Nagasaki University Graduate School of Biomedical Sciences, Nagasaki, Japan

\* These authors have contributed equally to the work

**Correspondence to:** Baochang He, *email:* hbc517@163.com

**Keywords:** oral cancer, tea, milk, non-smoker, non-drinker

**Received:** December 15, 2016

**Accepted:** January 24, 2017

**Published:** February 04, 2017

Copyright: Chen et al. This is an open-access article distributed under the terms of the Creative Commons Attribution License 3.0 (CC BY 3.0), which permits unrestricted use, distribution, and reproduction in any medium, provided the original author and source are credited.

### ABSTRACT

**This study aims to evaluate the independent and joint effects of tea and milk consumption on oral cancer risk among non-smokers and non-drinkers (NS/ND). A hospital-based case-control study was performed in Fujian, China. 421 cases and frequency-matched 1398 controls were included without tobacco smoking and alcohol drinking habits. Unconditional logistic regression model was used to assess the relationship of tea and milk consumption with oral cancer risk. Tea and milk consumption were significantly associated with decreased risk of oral cancer, the adjusted odds ratios (aORs) were 0.73 (95% CI: 0.54-0.97) and 0.69 (95% CI: 0.55-0.88), respectively. According to subgroup analysis, the inverse associations between tea consumption and oral cancer risk were only observed among the elders (>60 years) and urban residents. While the protect effect of milk drinking was more obvious in males, normal body mass index population (18.5–23.9), urban residents and those age ≤ 60 years. Additionally, a significantly multiplicative interaction between tea and milk consumption was observed for oral cancer risk ( $P = 0.001$ ). The present study is the first to simultaneously assess the association of tea consumption and milk drinking with oral cancer risk. The results suggest that tea and milk consumption are independent protective factors for oral cancer among NS/ND, with a joint effect between them.**

### INTRODUCTION

Oral cancer, a major subgroup of head and neck carcinoma, ranks the eighth most frequent cancer worldwide [1]. As reported, the age-standardized incidence rate of oral cancer in China was 2.22 per 100,000 and 0.9 per 100,000 as mortality rate in 2011 [2]. Tobacco smoking and alcohol drinking are considered as the main

risk factors [3, 4]. However, there are not all smokers and drinkers developing oral cancer, which suggests that other factors may play potential roles in the etiology of this disease.

Tea is the most consumed beverage in China, especially for the population in Fujian province, and the major types are green tea and black tea. It is well known that tea is characterized by a high content of polyphenols which has been identified to inhibit the tumor growth

**Table 1: Main characteristics of case and control subjects**

| Variables                | Cases (%)  | Controls (%) | P-value |
|--------------------------|------------|--------------|---------|
|                          | (n = 421)  | (n = 1398)   |         |
| Age(years)               |            |              | 0.114   |
| ≤60                      | 218(51.78) | 785(56.15)   |         |
| >60                      | 203(48.22) | 613(43.85)   |         |
| Gender                   |            |              | 0.126   |
| Male                     | 105(24.94) | 402(28.76)   |         |
| Female                   | 316(75.06) | 996(71.24)   |         |
| Residence                |            |              | 0.112   |
| Rural                    | 242(57.48) | 742(53.08)   |         |
| Urban                    | 179(42.52) | 656(46.92)   |         |
| Education level          |            |              | <0.001  |
| Primary and below        | 191(45.37) | 593(42.42)   |         |
| Middle school            | 174(41.33) | 448(32.05)   |         |
| College and above        | 56(13.30)  | 357(25.54)   |         |
| Marital status           |            |              | <0.001  |
| Married                  | 374(88.84) | 1132(80.97)  |         |
| Other                    | 47(11.16)  | 266(19.03)   |         |
| BMI (kg/m <sup>2</sup> ) |            |              | <0.001  |
| 18.5-23.9                | 259(61.52) | 809(57.87)   |         |
| <18.5                    | 52(12.35)  | 102(7.30)    |         |
| ≥24                      | 110(26.13) | 487(34.84)   |         |
| Denture wearing          |            |              | <0.001  |
| No                       | 216(51.31) | 873(62.45)   |         |
| Yes                      | 205(48.69) | 525(37.55)   |         |
| Tea consumption          |            |              | 0.015   |
| No                       | 345(81.95) | 1067(76.32)  |         |
| Yes                      | 76(18.05)  | 331(23.68)   |         |
| Milk consumption         |            |              | <0.001  |
| No                       | 254(60.33) | 685(49.00)   |         |
| Yes                      | 167(39.67) | 713(51.00)   |         |

and migration in animal models or human malignant cells *in vitro* [5], including the oral cancer [6]. In recent decades, with the development of dietary guidelines, milk consumption has also greatly increased in China. The anti-cancer properties of milk are mostly attributed to its calcium [7] and lactoferrin [8]. Moreover, evidences from laboratory studies also showed that milk could increase the anti-cancer effect of tea due to the interaction between epigallocatechin-3-gallate (EGCG) and lactoferrin [9].

Many epidemiologic studies have separately examined the relationship between tea or milk consumption and risk of oral cancer. Chen *et al.* [10] indicated that tea drinking reduced the risk of oral cancer, but Hildebrand *et al.* [11] observed no association.

Additionally, there are also controversial conclusions about milk intake and risk of oral cancer [12, 13]. However, to date, few epidemiologic studies reported the interaction between tea and milk drinking on oral cancer. Moreover, the majority of previous studies only adjusted smoking and alcohol drinking rather than limiting the subjects to non-smokers and non-drinkers (NS/ND) [14, 15], which may not completely eliminate the potential confounding effects of them.

Therefore, we conducted a hospital-based case-control study among NS/ND in China, aiming to elucidate the role of tea and milk consumption in oral cancer and further explore the joint effect of tea drinking and milk consumption on oral cancer.

**Table 2: Associations between tea and milk consumption and risk of oral cancer**

| Variables    | Tea consumption |      |                 |                        | Milk consumption |      |                 |                        |
|--------------|-----------------|------|-----------------|------------------------|------------------|------|-----------------|------------------------|
|              | No              |      | Yes             |                        | No               |      | Yes             |                        |
|              | Cases/ Controls | OR   | Cases/ Controls | OR(95%CI) <sup>a</sup> | Cases/ Controls  | OR   | Cases/ Controls | OR(95%CI) <sup>a</sup> |
| All subjects | 345/1067        | 1.00 | 76/331          | 0.73(0.54-0.97)        | 254/685          | 1.00 | 167/713         | 0.69(0.55-0.88)        |
| Age(years)   |                 |      |                 |                        |                  |      |                 |                        |
| ≤60          | 172/602         | 1.00 | 46/183          | 0.86(0.58-1.28)        | 137/334          | 1.00 | 81/451          | 0.61(0.44-0.85)        |
| >60          | 173/465         | 1.00 | 30/148          | 0.46(0.29-0.73)        | 117/351          | 1.00 | 86/262          | 0.82(0.59-1.16)        |
| Gender       |                 |      |                 |                        |                  |      |                 |                        |
| Male         | 73/252          | 1.00 | 32/150          | 0.68(0.42-1.11)        | 67/184           | 1.00 | 38/218          | 0.56(0.35-0.89)        |
| Female       | 272/815         | 1.00 | 44/181          | 0.74(0.51-1.06)        | 187/501          | 1.00 | 129/495         | 0.75(0.57-0.98)        |
| Residence    |                 |      |                 |                        |                  |      |                 |                        |
| Rural        | 200/626         | 1.00 | 42/116          | 1.03(0.69-1.55)        | 160/436          | 1.00 | 82/306          | 0.78(0.57-1.07)        |
| Urban        | 145/441         | 1.00 | 34/215          | 0.46(0.30-0.71)        | 94/249           | 1.00 | 85/407          | 0.55(0.39-0.78)        |
| BMI          |                 |      |                 |                        |                  |      |                 |                        |
| 18.5-23.9    | 215/631         | 1.00 | 44/178          | 0.71(0.48-1.04)        | 156/370          | 1.00 | 103/439         | 0.62(0.46-0.84)        |
| <18.5        | 43/87           | 1.00 | 9/15            | 0.95(0.35-2.57)        | 28/35            | 1.00 | 24/67           | 0.54(0.25-1.17)        |
| ≥24          | 87/349          | 1.00 | 23/138          | 0.70(0.41-1.18)        | 70/280           | 1.00 | 40/207          | 0.80(0.52-1.24)        |

<sup>a</sup>ORs were adjusted for age, gender, education level, marital status, residence, body mass index and denture wearing.

## RESULTS

The distribution of 421 cases and 1398 controls by main characteristics is presented in Table 1. Cases and controls were similar in the distributions of age, gender and residence ( $P > 0.05$ ), but significantly differed in education level, marital status, BMI, denture wearing, tea and milk consumption ( $P < 0.05$ ). The majority of subjects in this study were females, who accounted for 75.06% cases and 71.26% controls, respectively. Compared with oral cancer patients, controls were more likely to have tea

consumption, although the proportions of tea drinking were low in both groups (23.68% vs.18.05%). And milk drinking also showed a higher percentage among control subjects.

Table 2 shows the relationship between tea and milk consumption and risk of oral cancer among NS/ND. After adjustment for potential confounders, tea and milk consumption were significantly associated with decreased risk of oral cancer, the adjusted odds ratios (aORs) were 0.73 (95% CI: 0.54-0.97) and 0.69 (95% CI: 0.55-0.88), respectively. When stratified by age, gender, residence

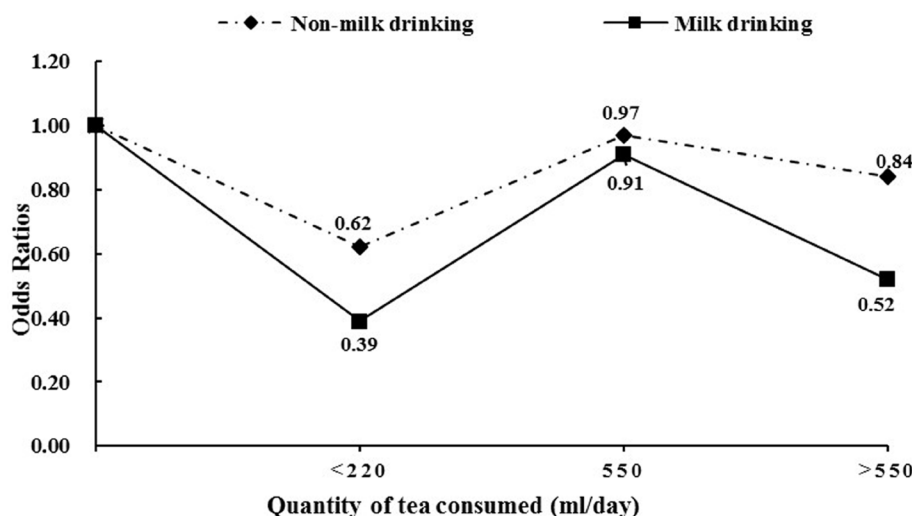

**Figure 1: Quantity of tea consumed (ml/day) and the risk of oral cancer stratified by milk drinking status.**

**Table 3: Tea consumption and the risk of oral cancer stratified by milk drinking status**

| Variables                           | Milk drinking  |                        | Non-milk drinking |                        |
|-------------------------------------|----------------|------------------------|-------------------|------------------------|
|                                     | Cases/Controls | OR(95%CI) <sup>a</sup> | Cases/Controls    | OR(95%CI) <sup>a</sup> |
| Tea consumption                     |                |                        |                   |                        |
| No                                  | 139/534        | 1.00                   | 206/533           | 1.00                   |
| Yes                                 | 28/179         | 0.62(0.39-0.98)        | 48/152            | 0.81(0.55-1.19)        |
| Duration of tea consumption (years) |                |                        |                   |                        |
| No                                  | 139/534        | 1.00                   | 206/533           | 1.00                   |
| <20                                 | 10/100         | 0.42(0.21-0.84)        | 21/69             | 0.72(0.42-1.24)        |
| ≥20                                 | 18/79          | 0.84(0.48-1.48)        | 27/83             | 0.89(0.55-1.44)        |
| Quantity of tea consumed (ml/day)   |                |                        |                   |                        |
| No                                  | 139/534        | 1.00                   | 206/533           | 1.00                   |
| <500                                | 13/104         | 0.49(0.27-0.92)        | 26/77             | 0.85(0.52-1.38)        |
| ≥500                                | 15/75          | 0.79(0.43-1.46)        | 22/75             | 0.77(0.46-1.31)        |
| Concentration of tea consumed       |                |                        |                   |                        |
| No                                  | 139/534        | 1.00                   | 206/533           | 1.00                   |
| Weak                                | 10/75          | 0.48(0.24-0.98)        | 17/54             | 0.78(0.44-1.40)        |
| Moderate                            | 15/88          | 0.68(0.38-1.23)        | 21/75             | 0.77(0.46-1.29)        |
| Strong                              | 3/16           | 0.73(0.21-2.56)        | 10/23             | 1.15(0.54-2.48)        |
| Types of tea                        |                |                        |                   |                        |
| No                                  | 139/535        | 1.00                   | 206/534           | 1.00                   |
| Green tea                           | 14/100         | 0.55(0.30-0.99)        | 26/76             | 0.91(0.56-1.48)        |
| Oolong tea                          | 9/41           | 0.90(0.42-1.96)        | 13/43             | 0.76(0.40-1.47)        |
| Others                              | 5/37           | 0.47(0.18-1.25)        | 9/32              | 0.77(0.36-1.66)        |

<sup>a</sup>ORs were adjusted for age(y), gender, education level, marital status, residence, body mass index and denture wearing.

**Table 4: Joint effect of tea and milk drinking on oral cancer risk.**

| Variables    |               | Cases(%) n = 421 | Controls(%) n = 1398 | OR(95%CI) <sup>a</sup> |
|--------------|---------------|------------------|----------------------|------------------------|
| Tea drinking | Milk drinking |                  |                      |                        |
| No           | No            | 206(48.93)       | 533(38.13)           | 1.00                   |
| No           | Yes           | 139(33.02)       | 534(38.20)           | 0.75(0.58-0.97)        |
| Yes          | No            | 48(11.40)        | 152(10.87)           | 0.87(0.60-1.26)        |
| Yes          | Yes           | 28(6.65)         | 179(12.80)           | 0.43(0.28-0.67)        |

<sup>a</sup>ORs were adjusted for age(y), gender, education level, marital status, residence, body mass index and denture wearing.

and BMI, a stronger protective effect of tea drinking was observed in older age group (>60 years) or urban residents. For milk intake, there were statistically significant reduced risk of oral cancer in men, normal mass index population (BMI) population, urban residents and those age ≤ 60 years.

When stratified by milk consumption, the associations between tea consumption and oral cancer risk were different (Table 3). In milk drinking population, 207 participants (23.5%) were reported a habit of tea consumption, and tea drinkers had the lower risk of oral cancer than non-tea drinkers (aOR=0.62, 95% CI:

0.39-0.98). Moreover, duration of tea consumption <20 years, quantity of tea consumed (ml/day) <500, weak concentration of tea consumed and green tea intake were at decreased risk for oral cancer. However, no associations were observed between tea-related variables and oral cancer risk among non-milk drinkers. Furthermore, the quantity of tea consumed (ml/day) was categorized into four groups based on tertiles of controls (zero, <220 ml/day, 220-550 ml/day, and >550 ml/day). And then, overall, the ORs of tea consumption from zero to more than 550 ml/day were lower among milk drinkers than non-milk drinkers. But there were not significant trends for the risk

with the increasing amount of tea consumed in two groups ( $P_{\text{trend}} > 0.05$ , Figure 1).

The joint effect of tea and milk consumption is shown in Table 4. On the comparison of those without tea and milk intake, participants who regularly consumed tea and milk showed the lowest risk of oral cancer (aOR=0.43, 95% CI: 0.28-0.67). Moreover, there was a significantly multiplicative interaction between tea and milk consumption on the risk of oral cancer. ( $OR_{\text{multiplicative}}=0.50$ , 95% CI=0.33-0.76;  $P=0.001$ ). However, the significantly additive interaction was not observed (RPRI: -0.19, 95% CI: -0.60 to 0.23; AP: -0.44, 95% CI: -1.45 to 0.58; SI: 1.49, 95% CI: 0.51 to 4.35; data not shown).

## DISCUSSION

Overall, in this hospital-based case-control study, tea or milk consumption showed a protective effect against oral cancer among NS/ND. Furthermore, the beneficial effect of tea consumption was only observed in milk drinkers but not in non-milk drinkers. Additionally, a significantly multiplicative interaction was found between tea and milk consumption on oral cancer risk.

Several previous epidemiological investigations have also demonstrated that tea consumption could reduce the risk of oral cancer [15, 16]. Evidence from laboratorial studies have identified that the anti-oxidant and anti-carcinogenic components of tea are mostly attributed to polyphenols (especially EGCG), with the inhibitory effects on proliferation and invasion of tumor cells [17, 18]. Interestingly, when stratified by select demographic characteristics, the negative correlations between tea drinking and oral cancer risk were more obvious in elders (>60 years) and urban residents, which is similar to a recent study [10]. However, the potential mechanisms suggested to explain these findings remain to be clarified.

Milk is well-known good source of calcium, dietary vitamin D and proteins that provides biological activities from anti-microbial effect [19], immunomodulatory activity [20] to anti-carcinogenic function [21], and thus contributes to human health. Nevertheless, results from epidemiological studies on the association between milk drinking and oral cancer risk are not consistent. A case-control study conducted in Swiss showed an inverse relation between milk intake and oral cancer risk [12], which is consistent with our result. Whereas a significantly increased risk was found by Bravi *et al.* [13]. The possible reasons for the inconsistencies may be owing to differences in study population and adjustment of covariates.

Adding milk to tea is a common practice in China. In this study, a significantly multiplicative interaction was observed between tea and milk consumption on the risk of oral cancer. A cellular experiment indicated that addition of lactoferrin to tea polyphenols had stronger effect on inhibition of tongue squamous cell proliferation than tea

polyphenols alone [9]. Mohan *et al.* [6] also obtained the similar results in buccal pouch carcinogenesis by animal model. This finding provides a new information that tea drinking with the addition of milk may reach to the greater benefit on the prevention of oral cancer.

In the present work, valid selection of all subjects was based on non-smoking and non-drinking population, helping to eliminate the confounding interferences of tobacco and alcohol. However, it also had several limitations. Firstly, recall bias is unavoidable in retrospective studies, but tea and milk consumption are not recognized to be associated with oral cancer in general, thus this possible bias would be non-differential among cases and controls. Secondly, since all subjects were recruited from only one hospital, selection bias should be concerned. However, the participation rates of cases and controls were high and all eligible subjects were based on strict criteria, which may reduce the possibility of selection bias. Thirdly, the amount constraints of these beverages consumed among NS/ND may weaken the authenticity and reliability of this study to a certain. Therefore, a further study with larger sample size is required to confirm the results of this work.

In conclusion, this hospital-based case-control study is the first to simultaneously assess the relationship of tea consumption and milk drinking with oral cancer risk. Our results suggest that tea and milk consumption are independent protective factors for oral cancer among NS/ND with a synergistic effect between them. The findings may provide a new strategy for oral cancer prevention.

## MATERIALS AND METHODS

### Study participants

From September 2010 to September 2016, we performed a hospital-based case-control study on oral cancer in Fujian province, China. As described previously [22], participants were recruited from the First Affiliated Hospital of Fujian Medical University and all subjects were NS/ND. Cases were defined as histologically confirmed primary oral carcinomas with no previous history of chemotherapy and radiotherapy. A total of 421 cases (median age 58 years, range: 20-91) were included in the final analysis. Meanwhile, 1398 controls (median age 54 years, range: 20-89) were recruited among inpatients and outpatients without a diagnosis of cancer, and frequency-matched by age ( $\pm 3$  years) and gender with cases. The subjects in control group included (1) healthy population; (2) ear and eye disorders; (3) skin and subcutaneous tissue disorders; (4) trauma; (5) upper-respiratory tract diseases; (6) gastro-intestinal disorders. The proportion of rejection in this study was less than 5%. This study was approved by the Institutional Review Board of Fujian Medical University (Fuzhou, China).

## Data collection

Face to face interviews were conducted by well-trained interviewers with the structured questionnaire to collect information, including socio-demographic characteristics, smoking and alcohol drinking history, tea and milk consumption habits, diet habits, oral health status and family history of cancer.

A person who had smoked less than 100 cigarettes and had not drunk as much as once a week in a lifetime was defined as never-smoker and never drinker. Tea consumption refers to drank at least 1 cup per week continuously for at least 6 months. Furthermore, the data on duration of tea-drinking habit (years), quantity of tea consumed (ml/day), concentration of tea (weak/moderate/strong) and types of tea (green tea/oolong tea/others), were obtained. The concentration of tea was evaluated based on the volume occupied by the brewed tea leaves in the cup (weak, the volume less than 25% of the cup; moderate, 25%-50%; and strong, >50%).

## Statistical analysis

Chi-square test was used to compare the distribution of demographic characteristics as well as tea and milk consumption between case and control groups. The associations of tea and milk drinking with oral cancer were estimated by odds ratios (ORs) and the corresponding 95% confidence intervals (CIs) derived from unconditional logistic regression model, and subgroup analysis was conducted by age group, gender, residence and BMI. Furthermore, we assessed the relationships between tea-related variables and oral cancer stratified by milk consumption. Multiplicative interaction between tea and milk consumption on oral cancer risk was also evaluated by unconditional logistic regression model. Additive interaction was assessed using the relative excess risk due to interaction (RERI), attributable proportion (AP), and synergy index (SI). The null values of RERI and AP were 0, while that of SI was 1. *P* values <0.05 (two-tailed) were considered significant. All analyses were conducted using R software version 3.1.1.

## ACKNOWLEDGMENTS

This study was funded by the Natural Science Foundation of Fujian Province (No. 2015J01304), Joint Funds for the Innovation of Science and Technology of Fujian province (No.2016Y9033).

## CONFLICTS OF INTEREST

The authors declare no conflict of interest.

## REFERENCES

1. Siegel R, Ward E, Brawley O and Jemal A. Cancer statistics, 2011: the impact of eliminating socioeconomic and racial disparities on premature cancer deaths. *CA Cancer J Clin.* 2011; 61:212-236.
2. Zhang SK, Zheng R, Chen Q, Zhang S, Sun X and Chen W. Oral cancer incidence and mortality in China, 2011. *Chin J Cancer Res.* 2015; 27:44-51.
3. Radoi L, Paget-Bailly S, Cyr D, Papadopoulos A, Guida F, Schmaus A, Cene S, Menvielle G, Carton M, Lapotre-Ledoux B, Delafosse P, Stucker I and Luce D. Tobacco smoking, alcohol drinking and risk of oral cavity cancer by subsite: results of a French population-based case-control study, the ICARE study. *Eur J Cancer Prev.* 2013; 22:268-276.
4. Ferreira Antunes JL, Toporcov TN, Biazevic MG, Boing AF, Scully C and Petti S. Joint and independent effects of alcohol drinking and tobacco smoking on oral cancer: a large case-control study. *PLoS One.* 2013; 8:e68132.
5. Yang CS, Wang H, Li GX, Yang Z, Guan F and Jin H. Cancer prevention by tea: Evidence from laboratory studies. *Pharmacol Res.* 2011; 64:113-122.
6. Mohan KV, Letchoumy PV, Hara Y and Nagini S. Combination chemoprevention of hamster buccal pouch carcinogenesis by bovine milk lactoferrin and black tea polyphenols. *Cancer Invest.* 2008; 26:193-201.
7. Cho E, Smith-Warner SA, Spiegelman D, Beeson WL, van den Brandt PA, Colditz GA, Folsom AR, Fraser GE, Freudenheim JL, Giovannucci E, Goldbohm RA, Graham S, Miller AB, et al. Dairy foods, calcium, and colorectal cancer: a pooled analysis of 10 cohort studies. *J Natl Cancer Inst.* 2004; 96:1015-1022.
8. Tsuda H, Sekine K, Ushida Y, Kuhara T, Takasuka N, Iigo M, Han BS and Moore MA. Milk and dairy products in cancer prevention: focus on bovine lactoferrin. *Mutat Res.* 2000; 462:227-233.
9. Mohan KV, Gunasekaran P, Varalakshmi E, Hara Y and Nagini S. In vitro evaluation of the anticancer effect of lactoferrin and tea polyphenol combination on oral carcinoma cells. *Cell Biol Int.* 2007; 31:599-608.
10. Chen F, He B, Hu Z, Huang J, Liu F, Yan L, Lin Z, Zheng X, Lin L, Zhang Z and Cai L. Passive smoking and cooking oil fumes (COF) may modify the association between tea consumption and oral cancer in Chinese women. *J Cancer Res Clin Oncol.* 2016; 142:995-1001.
11. Hildebrand JS, Patel AV, McCullough ML, Gaudet MM, Chen AY, Hayes RB and Gapstur SM. Coffee, tea, and fatal oral/pharyngeal cancer in a large prospective US cohort. *Am J Epidemiol.* 2013; 177:50-58.
12. Levi F, Pasche C, La Vecchia C, Lucchini F, Franceschi S and Monnier P. Food groups and risk of oral and pharyngeal cancer. *Int J Cancer.* 1998; 77:705-709.
13. Bravi F, Bosetti C, Filomeno M, Levi F, Garavello W,

- Galimberti S, Negri E and La Vecchia C. Foods, nutrients and the risk of oral and pharyngeal cancer. *Br J Cancer*. 2013; 109:2904-2910.
14. Radoi L, Paget-Bailly S, Menvielle G, Cyr D, Schmaus A, Carton M, Guida F, Cenee S, Sanchez M, Guizard AV, Velten M, Stucker I and Luce D. Tea and coffee consumption and risk of oral cavity cancer: results of a large population-based case-control study, the ICARE study. *Cancer Epidemiol*. 2013; 37:284-289.
  15. Fu JY, Gao J, Zhang ZY, Zheng JW, Luo JF, Zhong LP and Xiang YB. Tea consumption and the risk of oral cancer incidence: a case-control study from China. *Oral Oncol*. 2013; 49:918-922.
  16. Chen F, He B, Huang J, Liu F, Yan L, Hu Z, Lin L and He F. [Effect of tea on oral cancer in nonsmokers and nondrinkers: a case-control study]. [Article in Chinese]. *Zhonghua Yu Fang Yi Xue Za Zhi*. 2015; 49:683-687.
  17. Elattar TM and Virji AS. Effect of tea polyphenols on growth of oral squamous carcinoma cells in vitro. *Anticancer Res*. 2000; 20:3459-3465.
  18. Babich H, Krupka ME, Nissim HA and Zuckerbraun HL. Differential in vitro cytotoxicity of (-)-epicatechin gallate (ECG) to cancer and normal cells from the human oral cavity. *Toxicol In Vitro*. 2005; 19:231-242.
  19. Ajello M, Greco R, Giansanti F, Massucci MT, Antonini G and Valenti P. Anti-invasive activity of bovine lactoferrin towards group A streptococci. *Biochem Cell Biol*. 2002; 80:119-124.
  20. Mulder AM, Connellan PA, Oliver CJ, Morris CA and Stevenson LM. Bovine lactoferrin supplementation supports immune and antioxidant status in healthy human males. *Nutr Res*. 2008; 28:583-589.
  21. McKeown ST, Lundy FT, Nelson J, Lockhart D, Irwin CR, Cowan CG and Marley JJ. The cytotoxic effects of human neutrophil peptide-1 (HNP1) and lactoferrin on oral squamous cell carcinoma (OSCC) in vitro. *Oral Oncol*. 2006; 42:685-690.
  22. Chen F, He BC, Yan LJ, Qiu Y, Lin LS and Cai L. Influence of oral hygiene and its interaction with standard of education on the risk of oral cancer in women who neither smoked nor drank alcohol: a hospital-based, case-control study. *Br J Oral Maxillofac Surg*. 2016; doi:10.1016/j.bjoms.2016.11.316.
